# Supplementary material
Source: Research Square preprint supplement (doi:10.21203/rs.3.rs-10095848/v1)
Supplement: Supplementary file 1 [file f3c354ef4093bed9c866abe6.pdf]

# **Supplementary Information:**

## Neuromorphic Energy-Aware Learning for Adaptive Deep Brain Stimulation

### **Contents**

|          |                                                              |          |
|----------|--------------------------------------------------------------|----------|
| <b>1</b> | <b>Detailed Neuronal Dynamics and Gating Kinetics</b>        | <b>2</b> |
| 1.1      | Subthalamic Nucleus (STN) Neurons . . . . .                  | 2        |
| 1.2      | Other Neuronal Populations . . . . .                         | 3        |
| 1.3      | Synaptic Dynamics . . . . .                                  | 3        |
| 1.4      | Multi-Taper Point-Process Spectral Analysis . . . . .        | 3        |
| <b>2</b> | <b>Network Parameters</b>                                    | <b>4</b> |
| <b>3</b> | <b>EA-DSQN: Full Implementation Details</b>                  | <b>4</b> |
| <b>4</b> | <b>Sparsity-Constrained Knowledge Distillation Algorithm</b> | <b>7</b> |
| <b>5</b> | <b>Energy-Aware Stimulation Experimental Protocol</b>        | <b>8</b> |
| <b>6</b> | <b>State-Dependent Sensory Ablation</b>                      | <b>9</b> |

# 1 Detailed Neuronal Dynamics and Gating Kinetics

This section provides the complete set of algebraic equations governing the voltage-dependent gating variables for the biophysical network model described in the Main Text Methods.

## 1.1 Subthalamic Nucleus (STN) Neurons

The STN neuron model includes current contributions from sodium ( $I_{Na}$ ), potassium ( $I_K$ ), A-type potassium ( $I_A$ ), L-type calcium ( $I_L$ ), T-type calcium ( $I_T$ ), and calcium-dependent potassium ( $I_{CaK}$ ) channels. The steady-state activation/inactivation functions ( $x_\infty$ ) and time constants ( $\tau_x$ ) for a gating variable  $x$  are defined below. Voltage  $V$  is in mV, and  $[Ca]$  represents intracellular calcium concentration.

- **Sodium Current ( $I_{Na}$ ):  $m^3h$  kinetics**

$$m_\infty(V) = \frac{1}{1 + \exp\left(\frac{-(V+40)}{8}\right)}, \quad \tau_m(V) = 0.2 + \frac{3}{1 + \exp\left(\frac{-(V+53)}{-0.7}\right)} \quad (\text{S1})$$

$$h_\infty(V) = \frac{1}{1 + \exp\left(\frac{V+45.5}{6.4}\right)}, \quad \tau_h(V) = \frac{24.5}{\exp\left(\frac{-(V+50)}{-15}\right) + \exp\left(\frac{-(V+50)}{16}\right)} \quad (\text{S2})$$

- **Potassium Current ( $I_K$ ):  $n^4$  kinetics**

$$n_\infty(V) = \frac{1}{1 + \exp\left(\frac{-(V+41)}{14}\right)}, \quad \tau_n(V) = \frac{11}{\exp\left(\frac{-(V+40)}{-40}\right) + \exp\left(\frac{-(V+40)}{50}\right)} \quad (\text{S3})$$

- **A-type Potassium Current ( $I_A$ ):  $a^2b$  kinetics**

$$a_\infty(V) = \frac{1}{1 + \exp\left(\frac{-(V+45)}{14.7}\right)}, \quad \tau_a(V) = 1 + \frac{1}{1 + \exp\left(\frac{-(V+40)}{-0.5}\right)} \quad (\text{S4})$$

$$b_\infty(V) = \frac{1}{1 + \exp\left(\frac{V+90}{7.5}\right)}, \quad \tau_b(V) = \frac{200}{\exp\left(\frac{-(V+60)}{-30}\right) + \exp\left(\frac{-(V+40)}{10}\right)} \quad (\text{S5})$$

- **L-type Calcium Current ( $I_L$ ):  $c^2d_1d_2$  kinetics**

$$c_\infty(V) = \frac{1}{1 + \exp\left(\frac{-(V+30.6)}{5}\right)}, \quad \tau_c(V) = 45 + \frac{10}{\exp\left(\frac{-(V+27)}{-20}\right) + \exp\left(\frac{-(V+50)}{15}\right)} \quad (\text{S6})$$

$$d_{1\infty}(V) = \frac{1}{1 + \exp\left(\frac{V+60}{7.5}\right)}, \quad \tau_{d1}(V) = 400 + \frac{500}{\exp\left(\frac{-(V+40)}{-15}\right) + \exp\left(\frac{-(V+20)}{20}\right)} \quad (\text{S7})$$

$$d_{2\infty}([Ca]) = \frac{1}{1 + \exp\left(\frac{[Ca]-0.1}{0.02}\right)}, \quad \tau_{d2}(V) = 130 \quad (\text{constant}) \quad (\text{S8})$$

- **T-type Calcium Current ( $I_T$ ):  $p^2q$  kinetics**

$$p_\infty(V) = \frac{1}{1 + \exp\left(\frac{-(V+56)}{6.7}\right)}, \quad \tau_p(V) = 5 + \frac{0.33}{\exp\left(\frac{-(V+27)}{-10}\right) + \exp\left(\frac{-(V+102)}{15}\right)} \quad (\text{S9})$$

$$q_\infty(V) = \frac{1}{1 + \exp\left(\frac{V+85}{5.8}\right)}, \quad \tau_q(V) = \frac{400}{\exp\left(\frac{-(V+50)}{-15}\right) + \exp\left(\frac{-(V+50)}{16}\right)} \quad (\text{S10})$$

- **Calcium-dependent Potassium Current ( $I_{CaK}$ ):**  $r^2$  kinetics

$$r_\infty([Ca]) = \frac{1}{1 + \exp\left(\frac{-([Ca]-0.17)}{0.08}\right)}, \quad \tau_r(V) = 2 \quad (\text{constant}) \quad (\text{S11})$$

- **Intracellular Calcium Dynamics ( $[Ca]$ ):**

$$\frac{d[Ca]}{dt} = -\alpha(I_L + I_T) - k_{Ca}[Ca] \quad (\text{S12})$$

where  $\alpha = 1/(ZF) = 5.18 \times 10^{-6}$  is a conversion factor describing the ion flux per unit current ( $Z = 2$  is the calcium ion valence and  $F = 96,485$  C/mol is Faraday's constant), and the calcium extrusion rate is  $k_{Ca} = 2 \times 10^{-3}$  ms $^{-1}$ .

## 1.2 Other Neuronal Populations

The neuronal characteristics and gating variables for the Globus Pallidus (GPe/GPi), Thalamus (Th), and Striatal (D1/D2) neurons are grounded in the established Hodgkin-Huxley style models originally developed by Rubin and Terman [1]. However, the specific equations, parameters, and Cortical Izhikevich neuron implementations used in this simulation are adopted from the comprehensive rat cortico-basal ganglia-thalamic (CBGT) network model described by Kumaravelu et al. [2].

## 1.3 Synaptic Dynamics

Inter-population synapses are modeled with conductance-based kinetics. The synaptic current for a given connection is:

$$I_{syn}(t) = g_{max}S(t)(V(t) - E_{rev}) \quad (\text{S13})$$

where  $g_{max}$  is the maximal synaptic conductance,  $E_{rev}$  is the synaptic reversal potential, and the synaptic gating variable  $S(t)$  follows second-order kinetics with distinct rise ( $\tau_r$ ) and decay ( $\tau_d$ ) time constants. This introduces realistic temporal latencies (e.g., N-methyl-D-aspartate (NMDA)  $\tau_{decay} \approx 67$ –90 ms) that the neuromorphic controller must navigate.

## 1.4 Multi-Taper Point-Process Spectral Analysis

For offline validation and spectral analysis, we computed power spectral densities (PSDs) directly from the discrete GPi population spike times using the multi-taper point-process method. This approach evaluates spectral variance by averaging independent estimates obtained from a set of  $K$  orthogonal data tapers evaluated at exact spike times. Evaluating the spectrum at frequency  $f$  for a set of  $N_{sp}$  spike times  $\{t_j\}$  is defined as:

$$J_k(f) = \sum_{j=1}^{N_{sp}} h_k(t_j)e^{-i2\pi ft_j} - \frac{N_{sp}}{N\Delta t} H_k(f) \quad (\text{S14})$$

$$S(f) = \frac{1}{K} \sum_{k=1}^K |J_k(f)|^2 \quad (\text{S15})$$

where  $h_k(t_j)$  represents the  $k$ -th orthogonal Slepian taper (discrete prolate spheroidal sequence) interpolated to the spike time  $t_j$ , and the second term of  $J_k(f)$  centers the point process by subtracting the mean rate component, with  $H_k(f)$  defining the Fourier transform of the taper over the total duration  $N\Delta t$ . We selected a time-bandwidth product of  $NW = 3$ , which mathematically allows for a maximum of  $K = 2NW - 1 = 5$  strongly concentrated Slepian tapers. By averaging across these  $K = 5$  independent tapers, this approach ensures robust, low-variance estimation of oscillatory power independent of synaptic filtering assumptions or discrete time binning artifacts.

## 2 Network Parameters

The intrinsic parameters for each neuron type used in the simulation are listed in Table S1.

Table S1: Maximal conductances ( $mS/cm^2$ ) and reversal potentials ( $mV$ ) for the biophysical model.

| Parameter                       | Thalamus | STN  | GPe   | GPi   | Striatum (D1/D2) |
|---------------------------------|----------|------|-------|-------|------------------|
| Leak Conductance ( $g_{Leak}$ ) | 0.05     | 0.35 | 0.1   | 0.1   | 0.1              |
| Leak Reversal ( $E_{Leak}$ )    | -70      | -60  | -65   | -65   | -67              |
| Sodium ( $g_{Na}$ )             | 3.0      | 49.0 | 120.0 | 120.0 | 100.0            |
| Potassium ( $g_K$ )             | 5.0      | 57.0 | 30.0  | 30.0  | 80.0             |
| A-Type Potassium ( $g_A$ )      | –        | 5.0  | –     | –     | –                |
| T-type Calcium ( $g_T$ )        | 5.0      | 5.0  | 0.5   | 0.5   | –                |
| L-type Calcium ( $g_L$ )        | –        | 15.0 | –     | –     | –                |
| High-Thresh Ca ( $g_{Ca}$ )     | –        | –    | 0.15  | 0.15  | –                |
| Ca-dependent K ( $g_{CaK}$ )    | –        | 1.0  | –     | –     | –                |
| AHP Conductance ( $g_{AHP}$ )   | –        | –    | 10.0  | 10.0  | –                |

AHP: afterhyperpolarization conductance.

Table S2: Synaptic parameters used in the network simulation.  $\tau_{rise}$  and  $\tau_{decay}$  govern the synaptic gating variable  $S(t)$ . Delays ( $t_d$ ) represent axonal propagation time.

| Source $\rightarrow$ Target     | Receptor | Delay ( $t_d$ ms) | $\tau_{rise}$ (ms) | $\tau_{decay}$ (ms) |
|---------------------------------|----------|-------------------|--------------------|---------------------|
| Cortex $\rightarrow$ STN        | AMPA     | 5.9               | 0.5                | 2.49                |
| Cortex $\rightarrow$ STN        | NMDA     | 5.9               | 2.0                | 90.0                |
| Cortex $\rightarrow$ Striatum   | AMPA     | 5.1               | –                  | 5.0*                |
| STN $\rightarrow$ GPe           | AMPA     | 2.0               | 0.4                | 2.5                 |
| STN $\rightarrow$ GPe           | NMDA     | 2.0               | 2.0                | 67.0                |
| STN $\rightarrow$ GPi           | AMPA     | 1.5               | –                  | 5.0*                |
| GPe $\rightarrow$ STN           | GABA     | 4.0               | 0.4                | 7.7                 |
| GPe $\rightarrow$ GPi           | GABA     | 3.0               | –                  | 5.0*                |
| GPe $\rightarrow$ GPe           | GABA     | 1.0               | –                  | 5.0*                |
| GPi $\rightarrow$ Thalamus      | GABA     | 5.0               | –                  | 5.0*                |
| Striatum (D2) $\rightarrow$ GPe | GABA     | 5.0               | –                  | 5.0*                |
| Striatum (D1) $\rightarrow$ GPi | GABA     | 4.0               | –                  | 5.0*                |
| Thalamus $\rightarrow$ Cortex   | AMPA     | 5.0               | –                  | 5.0*                |

\*Modeled using single exponential decay ( $\alpha$ -function) where  $\tau_{decay}$  dominates dynamics. AMPA:  $\alpha$ -amino-3-hydroxy-5-methyl-4-isoxazolepropionic acid; NMDA: N-methyl-D-aspartate; GABA:  $\gamma$ -aminobutyric acid.

## 3 EA-DSQN: Full Implementation Details

This section expands Algorithm 1 from the Main Text, providing the complete implementation-level procedure required for exact reproducibility. The key additions relative to the main-text version are: (i) the 3-head action decoding over independent output sub-populations; (ii) explicit Q-value readout via membrane-potential accumulation; (iii) per-head Bellman targets; (iv) the sparsity regularisation loss applied to the two hidden LIF layers; and (v) gradient clipping via `clip_grad_value_(100)` rather than norm clipping.

**Note on gradient clipping.** The implementation uses `clip_grad_value_(100)`, which clips each individual gradient element to  $[-100, 100]$ , rather than the more common `clip_grad_norm_`. This choice prevents outlier gradients from destabilising early training when the SNN membrane potentials are randomly initialized.

Table S3: EA-DSQN hyperparameters used in all reported experiments.

| Hyperparameter           | Symbol                       | Value                                       |
|--------------------------|------------------------------|---------------------------------------------|
| Discount factor          | $\gamma$                     | 0.99                                        |
| Soft update coefficient  | $\tau_{\text{tgt}}$          | 0.005                                       |
| Learning rate            | $\eta$                       | $1 \times 10^{-3}$                          |
| Replay buffer size       | $ \mathcal{D} _{\text{max}}$ | 100,000                                     |
| Mini-batch size          | $B$                          | 128                                         |
| $\epsilon$ initial       | $\epsilon_0$                 | 0.9                                         |
| $\epsilon$ final         | $\epsilon_{\text{min}}$      | 0.05                                        |
| $\epsilon$ decay steps   | —                            | 2,000                                       |
| Energy-balance weight    | $\alpha$                     | 0.5                                         |
| Base therapeutic reward  | $\tau_{\text{reward}}$       | 3000                                        |
| Suppression penalty      | $\kappa$                     | 30                                          |
| $\beta$ -power threshold | $\tau_{\beta}$               | $150 \mu V^2$                               |
| Max stimulation energy   | $E_{\text{max}}$             | $250.0 \mu A$                               |
| Sparsity weight          | $\lambda$                    | 0.0 (teacher/baseline); grid-searched in KD |
| Target sparsity          | $\rho$                       | 0.0 (teacher/baseline); grid-searched in KD |
| Gradient clip value      | —                            | 100                                         |
| SNN time steps per obs.  | $T_{\text{win}}$             | 100                                         |

---

**Algorithm S1** EA-DSQN — Full Implementation

---

**Require:** Environment  $\mathcal{E}$ ; policy SNN  $\mathcal{S}_\theta$ ; target SNN  $\mathcal{S}_{\theta'}$ **Require:** Replay buffer  $\mathcal{D}$ ; batch size  $B$ ; discount  $\gamma$ ; soft-update coefficient  $\tau_{\text{tgt}}$ **Require:** Exploration  $\epsilon$ ;  $\beta$ -threshold  $\tau_\beta$ ; energy-balance weight  $\alpha$ ; suppression penalty  $\kappa$ **Require:** Sparsity weight  $\lambda$ ; target sparsity  $\rho$ 

```
1: Initialize  $\theta$  randomly;  $\theta' \leftarrow \theta$ 
2: Initialize AdamW optimizer with learning rate  $\eta$ 
3: for episode = 1, ...,  $N$  do
4:   Reset  $\mathcal{E}$ ; obtain initial state  $\mathbf{s}_1$ 
5:   Reset all LIF membrane potentials in  $\mathcal{S}_\theta$  and  $\mathcal{S}_{\theta'}$ 
6:   for  $t = 1, \dots, T_{\text{max}}$  do
7:     // Action selection ( $\beta$ -head  $\epsilon$ -greedy)
8:      $\mathbf{U}^S, \mathbf{Z}^S \leftarrow \mathcal{S}_\theta(\mathbf{s}_t)$  ▷ Forward pass;  $\mathbf{Z}^S$  are hidden spike trains
9:      $\hat{\mathbf{u}} \leftarrow \sum_k \mathbf{U}_k^S \in \mathbb{R}^9$  ▷ Accumulate membrane potentials over time steps
10:    With prob.  $\epsilon$  sample random  $a_t$ ; else
11:     $a_t^{(j)} \leftarrow \arg \max \hat{\mathbf{u}}_{[3j:3j+3]}$ ,  $j \in \{0, 1, 2\}$  ▷  $j=0, 1, 2$ :  $f, \delta, A$ 
12:    // Environment step
13:    Execute  $a_t$  in  $\mathcal{E}$ ; observe  $\mathbf{s}_{t+1}$ ,  $\beta$ -power  $\beta_t$ , energy  $E_t$ 
14:    // Reward (adaptive)
15:    if  $\beta_t > \tau_\beta$  then
16:       $r_t \leftarrow -\kappa \cdot (\beta_t - \tau_\beta)$  ▷ Clinical suppression penalty
17:    else
18:       $\bar{E} \leftarrow \min(E_t/E_{\text{max}}, 1.0)$ 
19:       $r_t \leftarrow \tau_{\text{reward}} \cdot ((1 - \alpha) + \alpha(1 - \bar{E}))$  ▷ Energy-savings gradient
20:    end if
21:    Store  $(\mathbf{s}_t, a_t, r_t, \mathbf{s}_{t+1})$  in  $\mathcal{D}$ ;  $\mathbf{s}_t \leftarrow \mathbf{s}_{t+1}$ ; decay  $\epsilon$ 
22:    // Optimisation
23:    if  $|\mathcal{D}| \geq B$  then
24:      Sample  $\{(\mathbf{s}_i, a_i, r_i, \mathbf{s}_{i+1})\}_{i=1}^B \sim \mathcal{D}$ 
25:       $\mathbf{U}^S, \mathbf{Z}^S \leftarrow \mathcal{S}_\theta(\mathbf{s}_i)$  ▷ Policy forward pass
26:       $\hat{\mathbf{u}}_i \leftarrow \sum_k \mathbf{U}_k^S \in \mathbb{R}^{B \times 9}$ 
27:       $\mathbf{q}_i \leftarrow \hat{\mathbf{u}}_i \llbracket [0, 3, 6] + a_i^{(j)} \rrbracket \in \mathbb{R}^{B \times 3}$  ▷ Gather per-head Q-values
28:       $\mathbf{U}^T, \mathbf{Z}^T \leftarrow \mathcal{S}_{\theta'}(\mathbf{s}_{i+1})$  ▷ Target forward pass
29:       $\hat{\mathbf{u}}_i^T \leftarrow \sum_k \mathbf{U}_k^T \in \mathbb{R}^{B \times 9}$ 
30:       $\mathbf{y}_i \leftarrow r_i + \gamma \max_{a'} \hat{\mathbf{u}}_{i, [3j:3j+3]}^T$ ,  $j \in \{0, 1, 2\}$  ▷ Per-head Bellman target  $\in \mathbb{R}^{B \times 3}$ 
31:       $\mathcal{L}_{\text{TD}} \leftarrow \frac{1}{B} \sum_{i=1}^B \text{SmoothL1}(\mathbf{q}_i, \mathbf{y}_i)$ 
32:      // Sparsity regularisation on hidden LIF layers
33:       $\bar{z}^{(l)} \leftarrow \text{mean}(\mathbf{Z}^{S, (l)})$ ,  $l \in \{1, 2\}$ 
34:       $\mathcal{L}_{\text{sp}} \leftarrow \lambda \sum_{l=1}^2 \text{KL}(\rho \parallel \bar{z}^{(l)})$ 
35:       $\mathcal{L} \leftarrow \mathcal{L}_{\text{TD}} + \mathcal{L}_{\text{sp}}$ 
36:       $\theta \leftarrow \text{ADAMW}(\theta, \nabla_\theta \mathcal{L}, \text{clip\_grad\_value}_{(100)})$ 
37:       $\theta' \leftarrow \tau_{\text{tgt}} \theta + (1 - \tau_{\text{tgt}}) \theta'$  ▷ Soft target update
38:    end if
39:  end for
40: end for
```

---

## 4 Sparsity-Constrained Knowledge Distillation Algorithm

---

**Algorithm S2** Sparsity-Constrained Knowledge Distillation for Hardware-Constrained SNNs

---

**Require:** Trained teacher SNN  $\mathcal{T}_{\theta_T}$ ; environment  $\mathcal{E}$

**Require:** Temperature  $T_{\text{KD}}$ ; target firing rate  $\rho^*$ ; sparsity weight  $\lambda$ ; learning rate  $\eta$ ; epochs  $N$

- 1: Initialize student SNN  $\mathcal{S}_{\theta_S}$  with random weights
  - 2: Initialize Adam optimizer with learning rate  $\eta$
  - 3: **for**  $n = 1, \dots, N$  **do**
  - 4:   Reset  $\mathcal{E}$ ; obtain raw spike train  $\mathbf{X} \in \{0, 1\}^{T \times C}$
  - 5:    $\mathbf{x} \leftarrow \text{AVGPOOL}(\mathbf{X})$  ▷ Downsample  $C=80 \rightarrow 16$  channels
  - 6:    $\mathbf{U}^T \leftarrow \mathcal{T}_{\theta_T}(\mathbf{x})$  ▷ Teacher forward pass (frozen)
  - 7:    $\mathbf{q}^T \leftarrow \sum_t \mathbf{U}_t^T$  ▷ Temporal integration  $\rightarrow$  Q-values
  - 8:    $\mathbf{U}^S, \{\mathbf{s}^{(l)}\}_{l=1}^{L_h} \leftarrow \mathcal{S}_{\theta_S}(\mathbf{x})$  ▷ Student forward pass
  - 9:    $\mathbf{q}^S \leftarrow \sum_t \mathbf{U}_t^S$
  - 10:    $\hat{\mathbf{p}}^T \leftarrow \text{softmax}(\mathbf{q}^T / T_{\text{KD}})$  ▷ Soft teacher targets
  - 11:    $\hat{\mathbf{p}}_{\log}^S \leftarrow \text{log-softmax}(\mathbf{q}^S / T_{\text{KD}})$  ▷ Student log-probabilities
  - 12:    $\mathcal{L}_{\text{KD}} \leftarrow T_{\text{KD}}^2 D_{\text{KL}}(\hat{\mathbf{p}}_{\log}^S \parallel \hat{\mathbf{p}}^T)$  ▷ Behaviour-matching loss
  - 13:   **for**  $l = 1, \dots, L_h$  **do** ▷ Sparsity penalty over hidden LIF layers
  - 14:      $\bar{\rho}_l \leftarrow \text{mean}(\mathbf{s}^{(l)})$  ▷ Empirical mean firing rate
  - 15:   **end for**
  - 16:    $\mathcal{L}_{\text{sparse}} \leftarrow \lambda \sum_{l=1}^{L_h} D_{\text{KL}}^{\text{Bern}}(\rho^* \parallel \bar{\rho}_l)$  ▷ Hardware-efficiency penalty
  - 17:    $w \leftarrow \min(1, 2n/N)$  ▷ Warm-up: linear ramp over first 50%
  - 18:    $\mathcal{L} \leftarrow \mathcal{L}_{\text{KD}} + w \cdot \mathcal{L}_{\text{sparse}}$  ▷ Total loss
  - 19:    $\theta_S \leftarrow \text{ADAM}(\theta_S, \nabla_{\theta_S} \mathcal{L}, \text{clip\_norm}=1.0)$  ▷ Update student weights
  - 20: **end for**
  - 21: **return**  $\theta_S$
-

## 5 Energy-Aware Stimulation Experimental Protocol

To quantify the stimulation energy savings of the energy-aware control policy, we conducted a cycling experiment comparing six conditions across alternating healthy and parkinsonian states. The simulation cycled through five 100-step blocks (10 s each): Healthy  $\rightarrow$  PD  $\rightarrow$  Healthy  $\rightarrow$  PD  $\rightarrow$  Healthy, for a total of 500 steps (50 s). Six conditions were evaluated:

1. **Unstimulated:** No stimulation applied (pathological baseline).
2. **Continuous DBS (cDBS):** Fixed stimulation at 130 Hz, 300  $\mu$ A, 0.3 ms.
3. **Clinical adaptive DBS (aDBS; Dual-Threshold):** A dual-threshold heuristic modeled after the clinical protocol validated with the Medtronic Activa PC neurostimulator. The heuristic uses instantaneous GPi  $\beta$ -band power as its sole biomarker and applies a hysteresis band to prevent rapid stimulation cycling: stimulation activates at clinical parameters (130 Hz, 300  $\mu$ A, 0.3 ms) when  $\beta$ -power exceeds an upper threshold ( $\tau_{\text{upper}} = 160 \mu V^2$ ) and deactivates when it falls below a lower threshold ( $\tau_{\text{lower}} = 140 \mu V^2$ ). Between the two bounds, the previous stimulation state is held.
4. **ANN Baseline (DQN):** A feedforward Deep Q-Network processing the spike matrix as a mean-pooled rate vector.
5. **RNN Baseline (GRU-DQN):** A recurrent GRU network processing the full 100-timestep observation through gated recurrent units.
6. **Adaptive SNN:** The energy-aware SNN controller, which continuously co-modulates all three stimulation parameters.

## 6 State-Dependent Sensory Ablation

To rule out the hypothesis that the Energy-Aware SNN controller converged to an open-loop strategy, we performed a sensory ablation study during continuous simulation. This experiment isolates the network’s dynamically computed state-dependent actions from its ingrained structural baseline reactions by entirely severing the sensory input pathway.

The SNN was evaluated across seven 500-step simulation blocks, subjecting the controller to a symmetrical sequence of environmental states and sensory deprivation (Figure S1):

1. **Healthy (Block 1):** Natural physiological spiking from a healthy GPi.
2. **Parkinsonian State (Block 2):** Closed-loop control against high  $\beta$ -band oscillations typical of Parkinson’s disease.
3. **Silent Brain (Block 3):** Sensory pathways are mathematically severed ( $X = 0$ ), simulating total sensor failure in an underlying pathological state.
4. **Healthy Recovery (Block 4):** Sensory pathways are reconnected to healthy neural firing.
5. **Silent Brain (Block 5):** Second sensory blackout period.
6. **Parkinsonian Recovery (Block 6):** Immediate re-engagement against the pathological state.
7. **Healthy (Block 7):** Final return to the healthy physiological baseline.

During active closed-loop periods (Blocks 2 and 6), the SNN suppresses pathological GPi oscillations from a baseline of  $\sim 325 \mu V^2$  to  $77.46 \mu V^2$  and  $82.12 \mu V^2$ , respectively, well below the clinical threshold of  $150 \mu V^2$ . These values reflect the dynamics of this specific alternating-state protocol and are not directly comparable to the acute efficacy measurements in the main text; the purpose here is to characterise how the SNN’s learned dynamics are retained and reactivated across state transitions, not to replicate a specific therapeutic outcome.

When the simulation transitions to the Silent Brain blocks (Blocks 3 and 5), sensory input vectors drop to zero. The SNN’s internal membrane potentials and synaptic currents decay naturally in the absence of input spikes. Rather than outputting chaotic or over-stimulating parameters, the SNN safely defaults to  $0.00 \mu A$  stimulation amplitude. Consequently, the untreated GPi network returns to its full pathological state ( $\sim 320\text{--}325 \mu V^2$ ). This fail-safe behavior validates that the SNN acts as a pure reactive controller that behaves in a stable, predictable manner when blinded.

The controller exhibits high resilience and rapid re-engagement following sensory deprivation. At the transition from Block 5 to Block 6, immediately after spending 500 steps in a completely blind state with  $0.00 \mu A$  stimulation, the SNN is re-exposed to live pathological parkinsonian feedback. It instantly re-engages closed-loop control, rapidly ramping stimulation amplitude back to  $\sim 60 \mu A$  and successfully restoring biomarker suppression. Finally, during the Healthy blocks directly following Silent blocks (Blocks 4 and 7), the mean local field potential (LFP) remains temporarily elevated ( $\sim 210\text{--}220 \mu V^2$ ) compared to the initial Healthy baseline. This hysteresis occurs because the biophysical GPi population, left untreated in a highly pathological state during the silent blocks, establishes a persistent resonant oscillation that takes time to naturally decay after the environment switches back to a healthy state without active pathological inputs to drive the SNN.

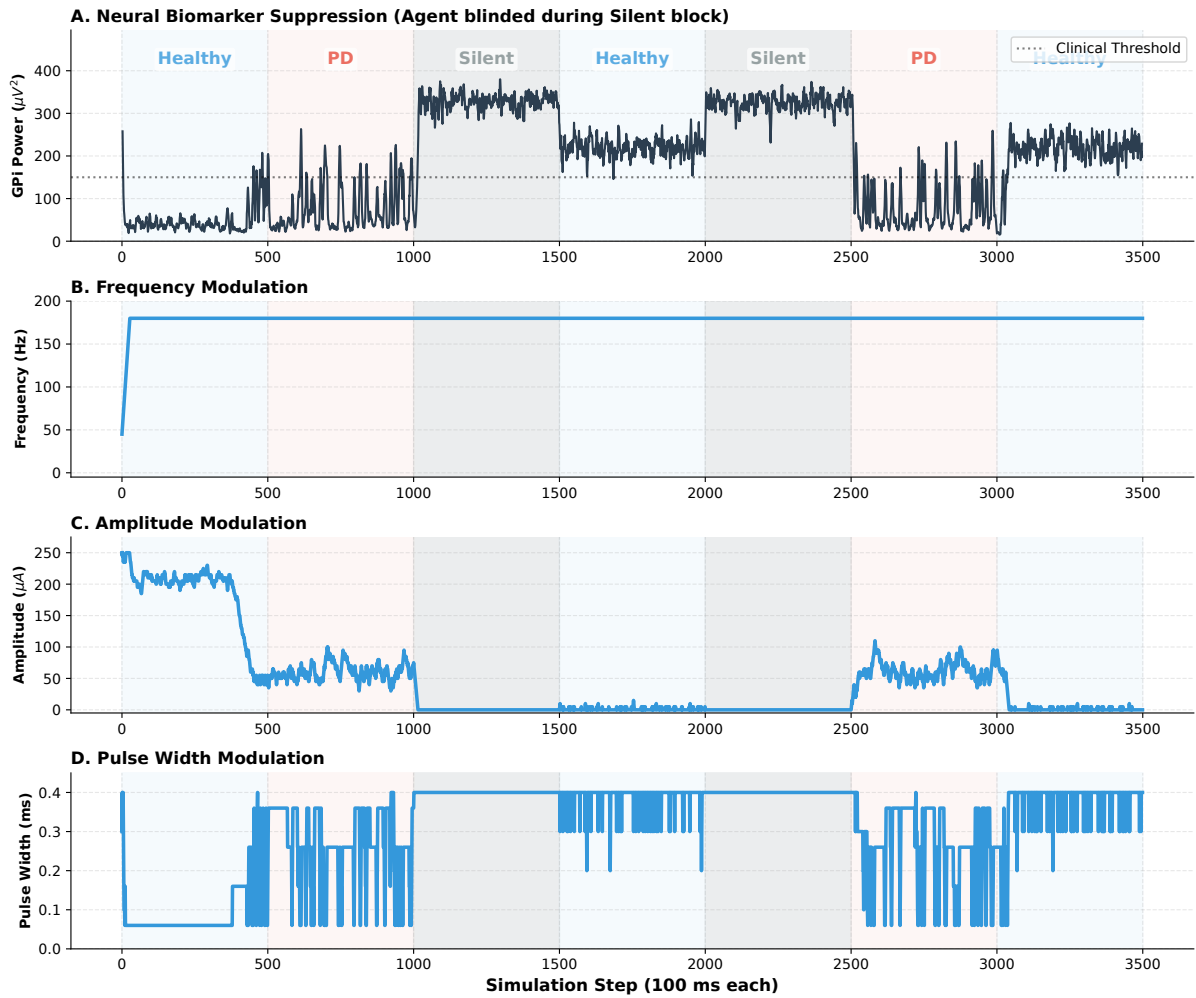

Figure S1: Sensory ablation study testing closed-loop behavior against a 3500-step sequence of Healthy, Parkinsonian, and Silent (sensory-deprived) states.

## References

- [1] Rubin JE, Terman D. High frequency stimulation of the subthalamic nucleus eliminates pathological thalamic rhythmicity in a computational model. *J Comput Neurosci.* 2004;16(3):211–235.
- [2] Kumaravelu K, Brocker DT, Grill WM. A biophysical model of the cortex-basal ganglia-thalamus network in the 6-OHDA lesioned rat model of Parkinson’s disease. *J Comput Neurosci.* 2016;40(2):207–229.
